# Supplementary material for: Tannic acid promotes the activation of persulfate with Fe(ii) for highly efficient trichloroethylene removal
Source: Royal Society of Chemistry journal article supplement (doi:10.1039/d3ra06004g), 2023-01-01
Supplement: d3ra06004g1.pdf [file d3ra06004g1.pdf]

Supplementary Materials for

## **Tannic acid promotes the activation of persulfate with Fe (II) for highly efficient trichloroethylene removal**

Mingda Che,<sup>a</sup> Hongjian Su,<sup>b</sup> Xudong Zhao,<sup>a</sup> Daqing Fu,<sup>b</sup> Renliang Huang,<sup>c</sup> Xuehui Guo<sup>b</sup> and Rongxin Su<sup>a\*</sup>

<sup>a</sup> State Key Laboratory of Chemical Engineering, Tianjin Key Laboratory of Membrane Science and Desalination Technology, School of Chemical Engineering and Technology, Tianjin University, Tianjin 300072, PR China

<sup>b</sup> 514 Brigade of North China Geological Exploration Bureau, Chengde 067000, PR China

<sup>c</sup> School of Marine Science and Technology, Tianjin University, Tianjin 300072, PR China

---

\* Author to whom correspondence should be addressed:

surx@tju.edu.cn (R.S.)

## Supplementary Tables

**Table S1.** Comparison of the removal of trichloroethylene from water in different systems.

| Methods        | Conditions                                                            | Initial pH | $C_0$ (mg L <sup>-1</sup> ) | $R_{mt}$ (%) | Refs.     |
|----------------|-----------------------------------------------------------------------|------------|-----------------------------|--------------|-----------|
|                |                                                                       | 1.5        | 55.0                        | 96.2         |           |
|                |                                                                       | 4.1        | 55.0                        | 99.1         |           |
| TA- Fe (II)-PS | [TA]=80 mg L <sup>-1</sup> , [Fe (II)]=1.5 mM,<br>[PS]=15 mM, T=298 K | 7.0        | 55.0                        | 98.8         | This work |
|                |                                                                       | 9.0        | 55.0                        | 98.5         |           |
|                |                                                                       | 11.0       | 55.0                        | 98.6         |           |
| nZVI/BC-PS     | [nZVI] = 4.5 mM, nZVI/BC mass<br>ratio=1:5 [PS] = 4.5 mM, T=298 K     | 10.0       | 19.7                        | 82.3         | 1         |
| Fe(II)- CA-PS  | [PS]=1.44 mM, [CA]=0.432 mM,<br>[Fe(II)]=0.288 mM, T=298 K            | 7.5        | 6.6                         | 79.0         | 2         |

|                                 |                                                                                                                                                  |     |       |       |   |
|---------------------------------|--------------------------------------------------------------------------------------------------------------------------------------------------|-----|-------|-------|---|
| PEI-nZVI                        | [PEI-nZVI]=2 g L <sup>-1</sup> , T=298 K                                                                                                         | /   | 50.0  | 90.0  | 3 |
| Dow Filmtec BW30XFR<br>Membrane | pressure=5 bar, flow rate=10 m <sup>3</sup> h <sup>-1</sup>                                                                                      | 6.5 | 100.0 | 100.0 | 4 |
| <i>Acidimicrobiaceae sp. A6</i> | [ <i>Acidimicrobiaceae sp. A6</i> ]=1.8 × 10 <sup>7</sup><br>copies ml <sup>-1</sup> , Fe(III)-NH <sub>4</sub> <sup>+</sup> enrichment<br>medium | 4.5 | 1.0   | 24%   | 5 |

---

Note: C<sub>0</sub> is the initial concentration of trichloroethylene, R<sub>mt</sub> is the removal percentage of trichloroethylene. TA=tannic acid, PS=persulfate, BC= Biochar, nZVI= Nanoscale zero-valent iron, CA= citric acid, PEI= polyethylenimine.

## Supplementary Figures

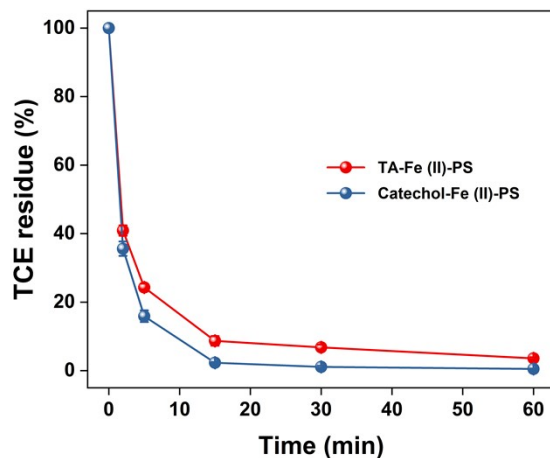

**Fig. S1 (a)** The comparison of the  $R_{st}$  of TCE in TA-Fe (II)-PS system and Catechol-Fe (II)-PS system. Conditions:  $[TCE] = 55 \text{ mg L}^{-1}$ ,  $[PS] = 15 \text{ mM}$ ,  $[TA] = [\text{catechol}] = 50 \text{ mg L}^{-1}$ ,  $[\text{Fe (II)}] = 3 \text{ mM}$ .

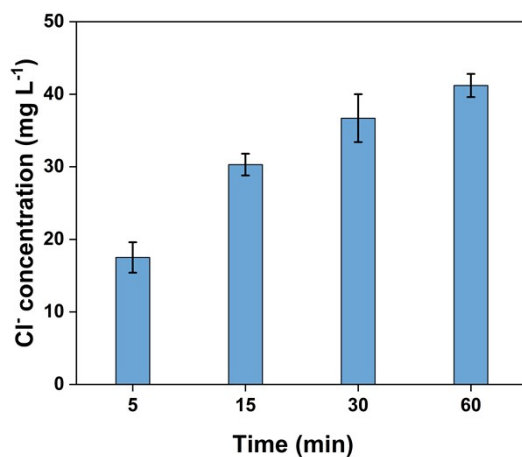

**Fig. S2** The Cl<sup>-</sup> concentrations in TA-Fe (II)-PS system during TCE removal. Conditions:  $[TCE] = 55 \text{ mg L}^{-1}$ ,  $[PS] = 15 \text{ mM}$ ,  $[TA] = [\text{catechol}] = 50 \text{ mg L}^{-1}$ ,  $[\text{Fe (II)}] = 3 \text{ mM}$ .

## References

1. J. Yan, L. Han, W. Gao, S. Xue and M. Chen, *Bioresour. Technol.*, 2015, **175**, 269-274.
2. R. Škarohlíd, L. McGachy, M. Martinec and Z. Rošková, *Environ. Technol. Innov.*, 2020, **19**, 101004.
3. K.-S. Lin, N. V. Mdlovu, C.-Y. Chen, C.-L. Chiang and K. Dehvari, *J. Clean. Prod.*, 2018, **175**, 456-466.
4. T. J. Ainscough, D. L. Oatley-Radcliffe and A. R. Barron, *Membranes*, 2021, **11**, 61.
5. J. Ge, S. Huang, I. Han and P. R. Jaffé, *Environ. Pollut.*, 2019, **247**, 248-255.
